1     **Epidemiology of drug-resistant tuberculosis in Chongqing, China: a**  
2                     **retrospective observational study from 2010 to 2017**

3

4     Bo Wu<sup>1¶</sup>, Ya Yu<sup>2¶</sup>, Changting Du<sup>1</sup>, Ying Liu<sup>3</sup>, Daiyu Hu<sup>2\*</sup>

5

6     <sup>1</sup>Outpatient Department, The Institute of Tuberculosis Prevention and Control,  
7     Chongqing, People's Republic of China

8

9     <sup>2</sup>Department of Prevention and Control, The Institute of Tuberculosis Prevention and  
10     Control, Chongqing, People's Republic of China

11

12     <sup>3</sup>Medical Administration Department, The Institute of Tuberculosis Prevention and  
13     Control, Chongqing, People's Republic of China

14

15     Current Address: The Institute of Tuberculosis Prevention and Control, NO.71  
16     Longteng Street, Jiulongpo District, Chongqing, People's Republic of China

17

18     \*Corresponding author

19     Email: [hukaixiou@263.net](mailto:hukaixiou@263.net) (DH)

20

21     <sup>¶</sup>These authors contributed equally to this work.

22

23     **Abstract**

24             China is one of the top 30 countries with high multidrug-resistant tuberculosis

25 (MDR-TB) and rifampin-resistant tuberculosis (RR-TB) burden. Chongqing is a  
26 southwest city of China with a large rural population. A retrospective observational  
27 study has been performed based on routine tuberculosis (TB) surveillance data in  
28 Chongqing from 2010 to 2017. The MDR/RR-TB notification rate increased from  
29 0.03 cases per 100,000 population in 2010 to 2.09 cases per 100,000 population in  
30 2017. The extensively drug-resistant TB (XDR-TB) notification rate has increased to  
31 0.09 cases per 100,000 population in 2017. There was a decreasing detection gap  
32 between the number of notified MDR/RR-TB cases and the estimate number of  
33 MDR/RR-TB cases among all notified TB cases. The treatment success rate of  
34 MDR/RR-TB was 50.66% in this period. The rate of MDR/RR-TB in new TB cases  
35 was 6.23%, and this rate in previously treated TB cases was 32.7%. Despite the  
36 progress achieved, the prevalence of MDR/RR-TB was still high facing challenges  
37 including detection gaps, the regional disparity, and the high risk for MDR/RR-TB in  
38 elderly people and farmers. Sustained government financing and policy support  
39 should be guaranteed in the future.

40

## 41 **Introduction**

42 Drug-resistant tuberculosis (DR-TB) threatens global TB prevention and control.  
43 MDR-TB, defined as TB resistant to at least rifampin (RFP) and isoniazid (INH), has  
44 longer treatment regimens and lower treatment success rate with supplies of less  
45 effective and more toxic second-line drugs [1]. RR-TB, defined as TB resistant to at  
46 least RFP, also requires a second-line regimen, and 83% of RR-TB cases have

47 MDR-TB [2].

48 From 2006 to 2014, China had implemented a project targeting MDR-TB  
49 through a partnership with the Global Fund to Fight AIDS, Tuberculosis, and Malaria  
50 (Global Fund) [3]. In 2009, the Bill and Melinda Gates Foundation and the Chinese  
51 Ministry of Health (now called the National Health Commission of China) announced  
52 the initiation of a comprehensive MDR-TB development programme aiming to  
53 provide innovative MDR-TB diagnosis tool, improve affordability of the treatment  
54 and the treatment success rate. A health system reform has also been launched since  
55 2009 in China [4]. However, the prevalence of MDR-TB remains high. China is one  
56 of the 30 high MDR/RR-TB burden countries, and has an estimated 73,000 incident  
57 cases of MDR/RR-TB in 2016, accounting for 12.15% of all MDR/RR-TB burden in  
58 the world [2].

59 Chongqing is a municipality directly under the central government in the  
60 southwest of China with about 30 million people. Approximately 23,000 TB patients  
61 were reported in Chongqing in 2017, and the TB notification rate was 77.1 cases per  
62 100,000 population which was 27.5% higher than the rate of the whole country. In  
63 2009 and 2013, Chongqing participated in the programme of the Bill and Melinda  
64 Gates Foundation and the Global Fund respectively. Significant improvement in  
65 MDR/RR-TB notification, diagnosis and treatment has been achieved since 2009. In  
66 2017, 643 MDR/RR-TB cases were notified in Chongqing, and the MDR/RR-TB  
67 notification rate is 2.1 cases per 100,000 population. In 2017, 29 cases with XDR-TB,  
68 defined as MDR-TB plus additional resistant to a fluoroquinolone and a second-line

69 injectable, were notified in Chongqing. However, gaps between MDR/RR-TB  
70 notifications and the estimate number of MDR/RR-TB cases remains big. In 2017,  
71 there were about 1000 MDR/RR-TB cases undetected in Chongqing.

72 This observational retrospective study tried to explore the trend of MDR/RR-TB  
73 and the changes of drug resistance patterns based on routine surveillance data in  
74 Chongqing from 2010 to 2017. Our study may serve as a reference for the future  
75 policy of MDR/RR-TB control in Chongqing and other regions with similar  
76 situations.

## 77 **Methods**

### 78 **Study design and data collection**

79 This was an observational retrospective study of notified MDR/RR-TB cases  
80 from 2010 to 2017 in Chongqing. The information of MDR/RR-TB cases came from  
81 the national electronic TB surveillance system.

82 The DR-TB notification rate from 2010 to 2017 was analyzed, including  
83 MDR/RR-TB and XDR TB. The MDR/RR-TB cases were stratified by age, sex, and  
84 occupation for trend analysis. The information of sex, age and occupation of  
85 MDR/RR-TB cases came from the national TB surveillance system. The  
86 socio-demographic data came from Chongqing Statistical Yearbook from 2010 to  
87 2017. According to the Chongqing Statistical Yearbook, the population in Chongqing  
88 was divided into four age groups: 0-17 years, 18-34 years, 35-59 years, and over-60  
89 years. The occupation of MDR/RR-TB cases was divided into farmers and  
90 non-farmers. The regional disparity of TB notification has also been evaluated.

91 According to the division of local government, there were four regions in Chongqing  
92 including: the Urban Districts, New Urban Development Districts, Northeast Districts  
93 and Southeast Districts. These regions were different in terms of socioeconomic  
94 development.

95 The detection gap between the number of notified MDR/RR-TB cases and the  
96 estimated number of MDR/RR-TB cases among all notified TB cases has been  
97 evaluated. According to the most recent measured MDR/RR-TB proportion in new  
98 and previously treated TB cases from the national DR-TB survey in 2013, the number  
99 of MDR/RR-TB cases among all notified TB cases could be estimated. This  
100 proportion could be used to multiply the number of notified TB cases, and the  
101 estimated number of MDR/RR-TB cases could be calculated.

102 The information of MDR/RR-TB screening, DST, diagnosis, treatment,  
103 management and outcome has been recorded in the national electronic surveillance  
104 system since 2010. The data of MDR/RR-TB cases from 2010 to 2017 came from this  
105 system. Reporting of extra-pulmonary TB was not mandatory in this system, thus all  
106 data were based on the pulmonary MDR/RR-TB cases. Population and socioeconomic  
107 data came from Chongqing Statistical Yearbook from 2010 to 2017.

## 108 **Risk factor analysis**

109 To explore risk factor associated with MDR/RR-TB in Chongqing, we have  
110 analyzed potential risk factors including age, sex, occupation, region, and treatment  
111 history. All MDR/RR-TB screening data from 2010 to 2017 were analyzed, and  
112 MDR/RR-TB cases have been compared with drug-susceptible TB cases.

## 113 **Drug resistance patterns**

114 Drug susceptible test (DST) include both phenotypic (conventional) and  
115 genotypic (molecular) testing methods. In Chongqing, conventional DST was  
116 performed at the provincial reference laboratory using the proportion method on  
117 acid-buffer Lowenstein-Jensen (L-J) Medium. The first-line drugs tested for  
118 drug-resistance included INH, RFP, ethambutol (EMB), and streptomycin (SM).  
119 There were two second-line drugs reported, including ofloxacin (OFX) and  
120 kanamycin (KM). Rapid molecular test was performed at capable county-level  
121 laboratories and prefectural laboratories. In Chongqing, the main rapid molecular test  
122 included Xpert MTB/RIF and fluorescence PCR melting curve method. Both rapid  
123 molecular tests could detect INH and RFP resistance in one day. External quality  
124 assessment has been conducted through national reference laboratory of China.

125 According to definitions and reporting framework for tuberculosis of World  
126 Health Organization (WHO) [5], the treatment outcome from 2010 cohort to 2015  
127 cohort was also analyzed. Treatment success was the sum of cured and treatment  
128 completed.

## 129 **Detection and treatment procedure**

130 In Chongqing, the MDR/RR-TB control system was constructed of three levels:  
131 province, prefecture, and county. Provincial TB prevention and control institution was  
132 responsible for administration, supervision, DST, and surveillance.

133 There were 38 counties and districts in Chongqing, every one of which had a  
134 county-level designated clinic for TB. The county-level designated clinics detected

135 TB cases according to the tuberculosis diagnostic criteria WS288-2008 of China [6],  
136 and screened MDR/RR-TB.

137 In early stages, inadequate resources limited the systematic development of  
138 screening. Screening had been conducted spontaneously in all counties and districts  
139 before 2010. With the introduction of some projects, screening was becoming more  
140 and more standardized. From March 2010 to December 2010, six counties and  
141 districts screened MDR/RR-TB supported by a domestic project, including Wanzhou  
142 district, Kaizhou district, Liangpin county, Yunyang county, Zhong county and  
143 Fengjie county. MDR/RR-TB suspects stemmed from sputum smear positive TB  
144 cases. From March 2011 to March 2012, five counties and districts screened  
145 MDR/RR-TB suspects from sputum smear positive TB cases supported by the Bill  
146 and Melinda Gates Foundation, including Jiangjin district, Dazhu district, Rongchang  
147 district, Tongliang district, and Yongchuan district.

148 Since 2013, screening in all counties and districts has supported by local  
149 government investment and the Global Fund. From 2013 to 2015, MDR/RR-TB  
150 suspects came from five high-risk groups, including (1) re-treatment cases with  
151 treatment failure or sputum smear positive cases with previous irregular treatment, (2)  
152 close contacts of MDR/RR-TB with sputum smear positive, (3) recurrence cases, (4)  
153 new cases persisting sputum smear positive at the end of 2<sup>nd</sup> month after treatment,  
154 and (5) new cases of initial treatment failure. In 2016, 20% of new cases with sputum  
155 smear positive and five high-risk groups were screened. In 2017, all new cases and  
156 five high-risk groups were screened. A new TB case was defined as a patient who has

157 never been treated or been treated less than 1 month, a re-treatment or previously  
158 treated case was defined as a patient who received TB treatment for 1 month or more  
159 previously, and a recurrence case was defined as a patient who was cured but  
160 diagnosed as TB again [5,7].

161 Since 2010, eighteen county-level laboratories had been furnished with rapid  
162 molecular test equipment, and seven prefectural laboratories had been set up. In the  
163 counties and districts furnished with rapid molecular test equipment, rapid molecular  
164 test was conducted firstly. If the result was resistant to INH and RFP or resistant at  
165 least to RFP and the suspect was part of five high-risk groups, the suspect would be  
166 diagnosed as MDR/RR-TB. If the first result was positive and the suspect was not part  
167 of five high-risk groups, another rapid molecular test would be required. Only when  
168 both results were positive, the suspect would be diagnosed as MDR/RR-TB. After  
169 rapid molecular test, the MDR/RR-TB cases would be referred to prefectural  
170 designated hospitals for treatment, and sputum culture was conducted in a  
171 county-level laboratory or a prefectural laboratory. If a positive culture result was  
172 confirmed, the strain of MDR/RR-TB suspect would be sent to the provincial  
173 reference laboratory for strain identification and DST. The results of strain  
174 identification and DST would be sent back to the county-level designated clinics and  
175 prefectural designated hospitals.

176 In the counties and districts without rapid molecular test equipment, sputum  
177 smear and culture was conducted in the county-level laboratories firstly. If the result  
178 of sputum culture was positive, the strain of MDR/RR-TB suspect would be sent to



179 the prefectural laboratories for rapid molecular test. After rapid molecular test, the rest  
180 procedure was the same as the previous diagnosis and treatment process.

181 There were eight prefectural designated hospitals appointed by the provincial  
182 health administration, which were in charge of MDR/RR-TB diagnosis,  
183 hospitalization, and return visits in their local area. After diagnosis by a prefectural  
184 expert review committee, most MDR/RR-TB cases were enrolled into a standardized  
185 regimen. MDR/RR-TB cases stayed 2 months in the prefectural designated hospital,  
186 and then received an ambulatory treatment course for 22 months managed by the  
187 county-level center for disease control and prevention (CDC) or county-level TB  
188 prevention and control institution.

## 189 **Ethics approval**

190 The study was approved by the Ethics Committee of the Institute of Tuberculosis  
191 Prevention and Control, Chongqing, China. In this study, there was no access to  
192 individual information. A secondary analysis based on reported data has been  
193 conducted and informed consent from individuals was not required. All methods  
194 were performed in accordance with relevant guidelines and regulations.

## 195 **Statistical analysis**

196 The chi-square test for linear trend was used to test the trend of the notification  
197 rate. A logistic regression model was performed to assess association between  
198 notification and risk factors. A two-sided P-value less than 0.05 was taken as  
199 statistically significant. Statistical analyses were performed with the SPSS 22.0  
200 software (SPSS, Inc., Chicago, IL, USA).

## 201 **Results**

### 202 **Trend of MDR/RR-TB notification**

203 From 2010 to 2017, 1,908 MDR/RR-TB cases were notified in Chongqing.  
204 Among them, 4.82% were XDR-TB cases. The MDR/RR-TB notification rate  
205 increased significantly from 0.03 cases per 100,000 population in 2010 to 2.09 cases  
206 per 100,000 population in 2017 ( $\chi^2$  trend=1,623.15,  $P<0.05$ ) (Fig 1). The XDR-TB  
207 notification rate increased significantly from 0.02 cases per 100,000 population in  
208 2003 to 0.09 cases per 100,000 population in 2017 ( $\chi^2$  trend=27.06,  $P=1.98\times 10^{-7}$ ).

209

210 **Fig 1. The trend of DR-TB notification rate from 2010 to 2017**

### 211 **MDR/RR-TB notification stratified by sex, age, and** 212 **occupation**

213 From 2010 to 2017, 70.02% of MDR/RR-TB cases were male. The  
214 MDR/RR-TB notification rate of male was significantly higher than the rate of female  
215 ( $\chi^2=2601.49$ ,  $P<0.05$ ). MDR/RR-TB notification rate of male increased significantly  
216 from 0.04 cases per 100,000 population in 2010 to 2.61 cases per 100,000 population  
217 in 2017 ( $\chi^2$  trend=1,133.68,  $P=1.58\times 10^{-248}$ ). MDR/RR-TB notification rate of female  
218 also increased significantly from 0.02 cases per 100,000 population in 2010 to 1.14  
219 cases per 100,000 population in 2017 ( $\chi^2$  trend=536.82,  $P=9.26\times 10^{-119}$ ).

220 From 2010 to 2017, the trend of age-specific MDR/RR-TB notification rate  
221 increased significantly among all age groups. The age-specific MDR/RR-TB  
222 notification rate was significantly different in four age groups ( $\chi^2=2106.04$ ,  $P<0.05$ ).

223 The MDR/RR-TB cases aged 18-34 and 35-59 accounted for 81.24% of all  
224 MDR/RR-TB cases. The MDR/RR-TB notification rate in the age group 18-34 years  
225 had a significant increase from 0.03 to 2.73 cases per 100,000 population ( $\chi^2$   
226 trend=585.3,  $P=2.63 \times 10^{-129}$ ). The MDR/RR-TB notification rate in the age group  
227 35-59 years also increased from 0.06 to 2.27 cases per 100,000 population ( $\chi^2$   
228 trend=764.9,  $P=2.31 \times 10^{-168}$ ). The MDR/RR-TB cases aged 0-17 had the lowest  
229 notification rate, and the notification rate increased significantly from 0 to 0.3 cases  
230 per 100,000 population ( $\chi^2$  trend=61.9,  $P=3.62 \times 10^{-15}$ ). The proportion of the  
231 MDR/RR-TB cases aged 0-17 was also lowest, which was 3.14%. The MDR/RR-TB  
232 notification rate of over-60-year age group increased significantly from 0 to 1.71  
233 cases per 100,000 population ( $\chi^2$  trend=264.69,  $P=1.63 \times 10^{-59}$ ) (Fig 2).

234

235 **Fig 2. The MDR/RR-TB notification rate in different age groups from 2010 to**

236 **2017**

237 The MDR/RR-TB notification rate of farmers was significantly higher than the  
238 rate of all other occupations from 2010 to 2017 ( $\chi^2=2616.58$ ,  $P<0.05$ ). The  
239 MDR/RR-TB notification rate of farmers has significantly increased ( $\chi^2$  trend=499.75,  
240  $P=1.08 \times 10^{-110}$ ).

### 241 **Regional disparity of MDR/RR-TB notification**

242 The MDR/RR-TB notification rate was significantly different in four regions  
243 ( $\chi^2=2102.04$ ,  $P<0.05$ ), and the MDR/RR-TB notification rate of Urban Districts has  
244 been higher than other three regions since 2014(Fig 3). The MDR/RR-TB notification

245 rate of Urban Districts has significantly increased from 0.16 to 7.72 cases per 100,000  
246 population ( $\chi^2$  trend=1,196.76,  $P=3.09 \times 10^{-262}$ ). In other three regions, The  
247 MDR/RR-TB notification rate was less than 1 case per 100,000 population.

248

249 **Fig 3. The MDR/RR-TB notification rate of different regions from 2010 to 2017**

## 250 **Detection gap**

251 According to the national DR-TB survey in 2013, the MDR/RR-TB proportion in  
252 new TB cases was 7.1% and the MDR/RR-TB proportion in previously treated TB  
253 cases was 24%<sup>2</sup>. The estimated number of MDR/RR-TB cases among all notified TB  
254 case from 2010 to 2017 was 15104, which was 691.61% higher than the number of  
255 MDR/RR-TB cases found now. The detection gap between the number of notified  
256 MDR/RR-TB cases and the estimate number of MDR/RR-TB cases among all  
257 notified TB cases has significantly declined from 7.26 to 3.35 cases per 100,000  
258 population ( $\chi^2$  trend=1,446.45  $P<0.05$ ) (Fig 4).

259

260 **Fig 4. The notification gaps from 2010 to 2017**

## 261 **Treatment outcome**

262 There were 618 MDR/RR-TB cases notified from 2010 to 2015, and the  
263 treatment success rate of MDR/RR-TB was 50.66% in this period. The death rate,  
264 treatment failure rate and rate of loss to follow-up were 13.49%, 9.21%, and 13.82%  
265 respectively. There were 132 cases who were not involved in treatment. In the 486  
266 cases involved in treatment, 124 cases had not treatment outcome information

267 reported. The treatment success rate of MDR/RR-TB increased significantly from  
268 20% in 2011 cohort to 51.81% in 2015 cohort ( $\chi^2$  trend=4.37,  $P=0.04$ ) (Fig 5).

269

270 **Fig 5. The MDR/RR-TB treatment outcome**

## 271 **Drug resistance patterns**

272 From 2010 to 2017, the rate of drug resistance for RFP in new TB cases was  
273 6.23%, and this rate in previously treated TB cases was 32.7%. Among all 12230 TB  
274 cases screened, RFP had the highest rate of drug resistance which was 17.13%,  
275 followed by INH (15.37%), SM (14.18%), EMB (9.43%), OFX (9.15%), and KM  
276 (2.42%). The drug resistance rate for RFP increased significantly from 3.07% in 2010  
277 to 15.53% in 2017 ( $\chi^2$  trend=172.92,  $P=1.71 \times 10^{-39}$ ). The drug resistance rate for INH  
278 had a similar trend which increased significantly from 5.46% in 2010 to 12.48% in  
279 2017 ( $\chi^2$  trend=60.19,  $P=8.6 \times 10^{-15}$ ). The other four drugs also showed a significant  
280 rising trend, including EMB ( $\chi^2$  trend=112.52,  $P=2.75 \times 10^{-26}$ ), SM ( $\chi^2$  trend=65.55,  
281  $P=5.66 \times 10^{-16}$ ), OFX ( $\chi^2$  trend=31.37,  $P=2.14 \times 10^{-8}$ ), and KM ( $\chi^2$  trend=11.47,  
282  $P=0.001$ ).

283 From 2016 to 2017, the drug resistance rate for RFP has declined significantly  
284 from 16.42% to 5.69% in new TB cases ( $\chi^2$  trend=77.24,  $P=1.52 \times 10^{-18}$ ) (Fig 6). In  
285 2016 and 2017, the drug resistance rate for RFP was 38.13% and 37.62% respectively  
286 in previously treated TB cases, which didn't change significantly ( $\chi^2$  trend=0.08,  
287  $P=0.78$ ) (Fig 7).

288 In 2011, some drug resistance rates had a peak in previously treated TB cases,

289 which were higher than the rates in 2010 and 2012(Fig 7). From 2010 to 2011, some  
290 drug resistance rates have increased significantly, including INH ( $\chi^2$  trend=10.72,  
291  $P=0.001$ ), RFP ( $\chi^2$  trend=9.51,  $P=0.002$ ), SM ( $\chi^2$  trend=9.64,  $P=0.002$ ), and OFX ( $\chi^2$   
292 trend=5.73,  $P=0.02$ ). From 2011 to 2012, some drug resistance rates have declined  
293 significantly, including INH ( $\chi^2$  trend=16.16,  $P=5.81 \times 10^{-5}$ ), RFP ( $\chi^2$  trend=16.95,  
294  $P=3.84 \times 10^{-5}$ ), EMB ( $\chi^2$  trend=18.64,  $P=1.58 \times 10^{-5}$ ), and SM ( $\chi^2$  trend=8.27,  $P=0.004$ ).

295

296 **Fig 6. The drug resistance patterns in new TB cases from 2010 to 2017**

297

298

299 **Fig 7. The drug resistance patterns in previously treated TB cases from 2010 to**

300 **2017**

301

### 302 **Risk factors associated with MDR/RR-TB**

303 The risk factors associated with MDR/RR-TB were analyzed (Table 1). Some  
304 groups of TB cases were more likely to have MDR/RR-TB in univariate analysis,  
305 including male (crude odds ratio [cOR], 1.4; 95% confidence Interval [CI],  
306 1.26-1.55), farmer (cOR, 2.98; 95% CI, 2.7-3.28), TB cases aged over-60 years (cOR,  
307 3.32; 95% CI, 2.2-5.02), previously treated TB cases (cOR, 7.63; 95% CI, 6.81-8.55),  
308 TB cases in Urban Districts (cOR, 0.33; 95% CI, 0.26-0.42), TB cases in New Urban  
309 Development Districts (cOR, 1.95; 95% CI, 1.51-2.53), TB cases in Northeast  
310 Districts (cOR, 2.7; 95% CI, 2.1-3.48).

311 In multivariate analysis, MDR/RR-TB notification was not significantly  
 312 associated with occupation (adjusted odds ratio [aOR], 1.09; 95% CI, 0.96-1.25).  
 313 Other risk factors associated with MDR/RR-TB in univariate analysis were still  
 314 correlated in multivariate analysis.

315 **Table 1. Risk factors associated with MDR/RR-TB**

| factors                                               | Univariate analysis |           |                             | Multivariate analysis |           |                           |
|-------------------------------------------------------|---------------------|-----------|-----------------------------|-----------------------|-----------|---------------------------|
|                                                       | cOR                 | 95% CI    | P                           | aOR                   | 95%CI     | P                         |
| <b>Gender (Compared with "Female")</b>                |                     |           |                             |                       |           |                           |
| <b>Male</b>                                           | 1.4                 | 1.26-1.55 | 6.32×<br>10 <sup>-10</sup>  | 1.28                  | 1.13-1.46 | 1.24×<br>10 <sup>-4</sup> |
| <b>Occupation (Compared with "others")</b>            |                     |           |                             |                       |           |                           |
| <b>Farmer</b>                                         | 2.98                | 2.7-3.28  | 2.24×<br>10 <sup>-107</sup> | 1.09                  | 0.96-1.25 | 0.18                      |
| <b>Age(Compared with "0-17")</b>                      |                     |           |                             |                       |           |                           |
| <b>18-34</b>                                          | 0.97                | 0.64-1.47 | 0.9                         | 1.05                  | 0.64-1.73 | 0.85                      |
| <b>34-59</b>                                          | 1.32                | 0.88-1.98 | 0.18                        | 1.42                  | 0.86-2.34 | 0.17                      |
| <b>&gt;60</b>                                         | 3.32                | 2.2-5.02  | 1.29×<br>10 <sup>-8</sup>   | 3.33                  | 2.01-5.53 | 3.21×<br>10 <sup>-6</sup> |
| <b>Treatment history (Compared with " new cases")</b> |                     |           |                             |                       |           |                           |
| <b>Previously treated cases</b>                       | 7.63                | 6.81-8.55 | 6.36×                       | 6.58                  | 5.82-7.43 | 1.03×                     |

---

|                                         |      |           |                    |      |           |                    |
|-----------------------------------------|------|-----------|--------------------|------|-----------|--------------------|
|                                         |      |           | 10 <sup>-270</sup> |      |           | 10 <sup>-200</sup> |
| <b>Region(Compared with " Southeast</b> |      |           |                    |      |           |                    |
| <b>Districts ")</b>                     |      |           |                    |      |           |                    |
|                                         |      |           | 4.59×              |      |           | 1.83×              |
| <b>Urban Districts</b>                  | 0.33 | 0.26-0.42 |                    | 0.32 | 0.25-0.42 |                    |
|                                         |      |           | 10 <sup>-19</sup>  |      |           | 10 <sup>-16</sup>  |
|                                         |      |           | 3.8×1              |      |           |                    |
| <b>New Urban Development Districts</b>  | 1.95 | 1.51-2.53 |                    | 1.35 | 1.02-1.78 | 0.04               |
|                                         |      |           | 0 <sup>-7</sup>    |      |           |                    |
|                                         |      |           | 1.58×              |      |           | 1.5×1              |
| <b>Northeast Districts</b>              | 2.7  | 2.1-3.48  |                    | 1.82 | 1.39-2.38 |                    |
|                                         |      |           | 10 <sup>-14</sup>  |      |           | 0 <sup>-5</sup>    |

---

316

317

## 318 Discussion

319 The MDR/RR-TB notification rate has increased significantly since 2010 in  
320 Chongqing. There were several reasons for this increase of MDR/RR-TB notification  
321 rate. One was that the foundation of MDR/RR-TB control system remained weak  
322 before 2009. The detection and treatment of MDR/RR-TB was not included in TB  
323 control plan of Chongqing in that period, and the MDR/RR-TB cases were not  
324 recorded in the TB surveillance system before 2010. This has contributed to the low  
325 MDR/RR-TB notification rate in early stage. Change began in 2009 by a project  
326 supported by the Bill and Melinda Gates Foundation [4]. This project aimed to  
327 improve MDR/RR-TB diagnosis and treatment in some counties and districts in 2011,  
328 including the following measures: the introduction of rapid molecular diagnosis,



329 promotion of investment by local medical insurance and the foundation covering 90%  
330 of the medical cost, standard MDR/RR-TB treatment regimen and management,  
331 improved MDR/RR-TB detection, and establishment of cooperative mechanism  
332 between hospitals and CDC. Driven by this project, government funding for  
333 MDR/RR-TB has been rising year by year, and a sustainable financing mechanism  
334 has been established. After this project, the reimbursement rate of medical insurance  
335 for MDR/RR-TB has been increased to 90% with inpatient and outpatient care. The  
336 MDR/RR-TB screening has been financed by government since 2012, and rapid  
337 molecular diagnosis equipment was distributed to some laboratories. The scope of  
338 MDR/RR-TB screening has been expanded from five high-risk groups to all new TB  
339 cases and five high-risk groups. The laboratory diagnostic ability has been improved  
340 with continual training and supervision. The MDR/RR-TB reporting has been  
341 required in the electronic national TB surveillance system since 2010. With these  
342 improved measures, more and more MDR/RR-TB cases were notified. In 2017, the  
343 MDR/RR-TB notification rate was 2.09 cases per 100,000 population. But there still  
344 remained a big detection gap between the number of notified MDR/RR-TB cases and  
345 the estimate number of MDR/RR-TB cases among all notified TB cases. Screening  
346 should be further strengthened with more investment by government.

347 In Chongqing, the MDR/RR-TB notification rate of male was significantly  
348 higher than the rate of female, and male was more likely to develop MDR/RR-TB  
349 than female according to the correlation analysis. But gender impact on MDR/RR-TB  
350 was reported differently in different regions. There was no association with gender in

351 several studies [8-13]. In some regions of China, studies showed that female was more  
352 likely to develop MDR/RR-TB [14, 15]. Socioeconomic condition could be one of the  
353 reasons for this difference. Chongqing was a city with a large poor rural population  
354 and many underdeveloped regions. Many men needed to go out to developed regions  
355 to work and support their families. Inadequate treatment and irregular management  
356 were more likely to happen in these cases with TB, which were important risk factors  
357 leading to MDR/RR-TB [16-18].

358 The MDR/RR-TB notification rate of over-60-year age group was not the highest  
359 in the four age groups. But our correlation analysis based on screening data showed  
360 that only over-60-year age group was the risk factor associated with MDR/RR-TB.  
361 There may be a contradiction between the two sets. This contradiction may indicate  
362 that the MDR/RR-TB notification in over-60-year age group was under-reported.  
363 Other study also showed that aging was a risk factor of MDR/RR-TB [11]. The  
364 correlation between aging and MDR/RR-TB might be due to socioeconomic status  
365 and common diseases of the elderly, like diabetes [19, 20]. The screening for  
366 MDR/RR-TB in elder TB cases should be strengthened.

367 The MDR/RR-TB notification rate of farmers was higher than the rate of all  
368 other occupations and increased to 4.11 cases per 100,000 population in 2017. Our  
369 study showed that the occupation of farmer was associated with MDR/RR-TB, and  
370 some studies in other regions of China also showed that farmer was a risk factor [21].  
371 In Chongqing, farmer was a poor occupation. Although the income of farmer has gone  
372 up rapidly in recent years, the socioeconomic status of them was still low. According

373 to Chongqing Statistical Yearbook, the annual income of farmers was less than half of  
374 urban residents. MDR/RR-TB were closely associated with poverty [22-24]. Medical  
375 services for MDR/RR-TB were often poorly accessible in rural areas [25].

376 The MDR/RR-TB notification rate of Urban Districts has been significantly  
377 higher than other three regions. But the region of Urban Districts was a protective  
378 factor in the correlation analysis for regional disparity. This was another contradiction  
379 in our study which may indicate that the detection of MDR/RR-TB was  
380 underestimated in other three regions. According to Chongqing Statistical Yearbook,  
381 the GDP per capita of Urban Districts was about two times higher than the level of  
382 other three regions from 2010 to 2017. The two largest prefectural designated  
383 hospitals, the provincial reference laboratory and provincial TB prevention and  
384 control institution were all located in Urban Districts. The lower socioeconomic status  
385 and weakness in health resources may lead to the under notification of MDR/RR-TB  
386 in other three regions.

387 Great progress has been made in the treatment of MDR/RR-TB. The treatment  
388 success rate increased significantly from 20% in 2011 cohort to 51.81% in 2015  
389 cohort. The treatment success rate was 41% in 2014 cohort for whole China [2].  
390 Cooperation between hospitals and CDC has proved successful. But 21.36% of  
391 notified cases were not involved in treatment, and 20.06% of them had not treatment  
392 outcome information reported. Even if medical insurance has covered 90% of the  
393 medical cost of MDR/RR-TB treatment, some poor cases still could not afford the  
394 out-of-pocket expenses, and were not involved in treatment because of poverty [26].

395 The information loss of treatment outcome indicated that cooperation between  
396 hospitals and CDC needed to be strengthened in the fields of information delivery and  
397 patient management.

398 From 2010 to 2017, the drug resistance rate for RFP in new TB cases was 6.23%,  
399 and this rate in previously treated TB cases was 32.7% in Chongqing. This rate was  
400 only 4.1% in new TB cases and 19% in previously treated TB cases globally [2].  
401 Chongqing is facing high prevalence of MDR/RR-TB, especially in previously treated  
402 TB cases. The drug resistance rate for RFP increased significantly from 3.07% in  
403 2010 to 15.53% in 2017. There were two possible reasons. One was that screening in  
404 high-risk groups has been effectively implemented in recent years, and more and more  
405 MDR/RR-TB cases were notified. A significant improvement in laboratory diagnostic  
406 capacity may be the other one. In 2011, some drug resistance rates had a peak in  
407 previously treated TB cases. In this year, some counties and districts screened  
408 MDR/RR-TB in sputum smear positive TB cases systematically supported by the Bill  
409 and Melinda Gates Foundation. Many MDR/RR-TB cases accumulated over the years  
410 have been notified, which led to this peak. In 2017, the drug resistance rate for RFP in  
411 new TB cases has declined significantly, and this was mainly due to the expansion of  
412 screening in 2017. All new TB cases including sputum smear negative have been  
413 required to be screened since 2017. The new screening policy has led to this drug  
414 resistance rate decrease in new TB cases.

415 This study has limitations. The epidemiological survey for MDR/RR-TB has not  
416 been implemented in recent years, so the routine surveillance data have been analyzed

417 in our study. Only two second-line drug susceptibility results were recorded in the  
418 electronic surveillance system. The population could only be divided into four age  
419 groups according to Chongqing Statistical Yearbook.

420 In conclusion, MDR/RR-TB control over the years has been effective in  
421 Chongqing, and more and more MDR/RR-TB cases have been notified and treated.  
422 But the prevalence of MDR/RR-TB is still high, and facing the challenges including  
423 detection and treatment gaps, the regional disparity due to socioeconomic status, the  
424 under-notification in elderly people, and the high notification rate in farmers.  
425 Sustained government financing and policy support should be guaranteed to ensure  
426 universal access to effective MDR/RR-TB medical care.

427

## 428 **References**

- 429 1 World Health Organization. WHO treatment guidelines for drug-resistant  
430 tuberculosis, 2016 update. World Health Organization, Geneva, Switzerland. 2016;  
431 04. Available from:  
432 <http://www.tbonline.info/media/uploads/documents/mdrtbguidelines2016.pdf>
- 433 2 World Health Organization. Global tuberculosis report 2017. World Health  
434 Organization, Geneva, Switzerland. 2017; 23. Available from:  
435 [https://www.who.int/tb/publications/global\\_report/MainText\\_13Nov2017.pdf?ua=1](https://www.who.int/tb/publications/global_report/MainText_13Nov2017.pdf?ua=1)
- 436 3 Wang L, Li R, Xu C, Zhang H, Ruan Y, Chen M, Wang D, et al. The Global  
437 Fund in China: Multidrug-resistant tuberculosis nationwide programmatic scale-up  
438 and challenges to transition to full country ownership. PLoS One. 2017; 12(6):

- 439 e0177536. doi: 10.1371/journal.pone.0177536
- 440 4 Long Q, Qu Y, Lucas, H. Drug-resistant tuberculosis control in China: progress  
441 and challenges. *Infect Dis Poverty*. 2016; **5**: 9. doi: 10.1186/s40249-016-0103-3
- 442 5 World Health Organization. Definitions and reporting framework for tuberculosis  
443 2013 revision. World Health Organization, Geneva, Switherland. 2013; 2. Available  
444 from:  
445 [https://apps.who.int/iris/bitstream/handle/10665/79199/9789241505345\\_eng.pdf;sequ](https://apps.who.int/iris/bitstream/handle/10665/79199/9789241505345_eng.pdf;sequence=1)  
446 [ence=1](https://apps.who.int/iris/bitstream/handle/10665/79199/9789241505345_eng.pdf;sequence=1)
- 447 6 Ministry of Public Health of the People's Republic of China. Diagnostic criteria  
448 of tuberculosis (WS288-2008). Beijing: Ministry of Public Health of the People's  
449 Republic of China; 2008.
- 450 7 World Health Oragnization. Guidelines fo Surveillance of Drug Resistance in  
451 Tuberculosis. World Health Organization, Geneva, Switherland. 2015;13. Available  
452 from: [https://www.who.int/tb/publications/2015/drs\\_guidelines/en/](https://www.who.int/tb/publications/2015/drs_guidelines/en/)
- 453 8 Farazi A, Sofian M, Zarrinfar N, Katebi F, Hoseini SD, Keshavarz R. Drug  
454 resistance pattern and associated risk factors of tuberculosis patients in the central  
455 province of Iran. *Caspian J Intern Med*. 2013; 4(4): 785-9.
- 456 9 Nair SA, Raizada N, Sachdeva KS, Denkinger C, Schumacher S, Dewan P, et al.  
457 Factors Associated with Tuberculosis and Rifampicin-Resistant Tuberculosis amongst  
458 Symptomatic Patients in India: A Retrospective Analysis. *PLoS One*. 2016; 11(2):  
459 e0150054. doi: 10.1371/journal.pone.0150054
- 460 10 Li WB, Zhang YQ, Xing J, Ma ZY, Qu YH, Li XX. Factors associated with

- 461 primary transmission of multidrug-resistant tuberculosis compared with healthy  
462 controls in Henan Province, China. *Infect Dis Poverty*. 2015; 4, 14. doi:  
463 10.1186/s40249-015-0045-1
- 464 11 Lv XT, Lu XW, Shi XY, Zhou L. Prevalence and risk factors of multi-drug  
465 resistant tuberculosis in Dalian, China. *J Int Med Res*. 2017; 45 (6): 1779-1786. doi:  
466 10.1177/0300060516687429
- 467 12 Yin QQ, Jiao WW, Li QJ, Xu F, Li JQ, Sun L. Prevalence and molecular  
468 characteristics of drug-resistant *Mycobacterium tuberculosis* in Beijing, China: 2006  
469 versus 2012. *BMC Microbiol*. 2016; 16: 85. doi: 10.1186/s12866-016-0699-2
- 470 13 Chen S, Huai P, Wang X, Zhong J, Wang X, Wang K, et al. Risk factors for  
471 multidrug resistance among previously treated patients with tuberculosis in eastern  
472 China: a case-control study. *Int J Infect Dis*. 2013; 17(12): e1116-20. doi:  
473 10.1016/j.ijid.2013.06.006
- 474 14 Wang SF, Zhou Y, Pang Y, Zheng HW, Zhao YL. Prevalence and Risk Factors of  
475 Primary Drug-Resistant Tuberculosis in China. *Biomed Environ Sci*. 2016; 29(2):  
476 91-8. doi: 10.3967/bes2016.010
- 477 15 Liu Q, Zhu L, Shao Y, Song H, Li G, Zhou Y, et al. Rates and risk factors for  
478 drug resistance tuberculosis in Northeastern China. *BMC Public Health*. 2013; 13:  
479 1171. doi: 10.1186/1471-2458-13-1171
- 480 16 Rumende, C. M. Risk Factors for Multidrug-resistant Tuberculosis. *Acta Med*  
481 *Indones*. 2018; 50(1): 1-2.
- 482 17 Dean AS, Cox H, Zignol M. Epidemiology of Drug-Resistant Tuberculosis. *Adv*

- 483 Exp Med Biol. 2017; 1019: 209-220. doi: 10.1007/978-3-319-64371-7\_11
- 484 18 Van der Werf MJ, Langendam MW, Huitric E, Manissero D. Multidrug  
485 resistance after inappropriate tuberculosis treatment: a meta-analysis. Eur Respir J.  
486 2012; 39(6):1511-9. doi: 10.1183/09031936.00125711
- 487 19 Liu Q, Li W, Xue M, Chen Y, Du X, Wang C, et al. Diabetes mellitus and the  
488 risk of multidrug resistant tuberculosis: a meta-analysis. Sci Rep. 2017; 7(1): 1090.  
489 doi: 10.1038/s41598-017-01213-5
- 490 20 Saktiawati AMI, Subronto YW. Influence of Diabetes Mellitus on the  
491 Development of Multi Drug Resistant-Tuberculosis in Yogyakarta. Acta Med  
492 Indones. 2018; 50(1): 11-17.
- 493 21 He GX, Wang HY, Borgdorff MW, van Soolingen D, Van der Werf MJ, Liu ZM,  
494 et al. Multidrug-resistant tuberculosis, People's Republic of China, 2007-2009. Emerg  
495 Infect Dis. 2011; 17(10): 1831-8. doi: 10.3201/eid1710.110546
- 496 22 Keshavjee S, Gelmanova IY, Pasechnikov AD, Mishustin SP, Andreev YG,  
497 Yedilbayev A, et al. Treating multidrug-resistant tuberculosis in Tomsk, Russia:  
498 developing programs that address the linkage between poverty and disease. Ann N Y  
499 Acad Sci. 2008; 1136:1-11. doi: 10.1196/annals.1425.009
- 500 23 Marahatta, SB. Multidrug-resistant tuberculosis burden and risk factors: an  
501 update. Kathmandu Univ Med J (KUMJ). 2010; 8(29): 116-25.
- 502 24 Kirenga BJ, Ssengooba W, Muwonge C, Nakiyingi L, Kyaligonza S, Kasozi S, et  
503 al. Tuberculosis risk factors among tuberculosis patients in Kampala, Uganda:  
504 implications for tuberculosis control. BMC Public Health. 2015; 15:13. doi:



505 10.1186/s12889-015-1376-3

506 25 Cai X, Zhang D, Yan Y, Tan D, Xu Y. Meta-analysis on risk factors of multidrug  
507 resistant tuberculosis in China. *Zhonghua Liu Xing Bing Xue Za Zhi*. 2015; 36(12):  
508 1424-9.

509 26 Xu Z, Xiao T, Li Y, Yang K, Tang Y, Bai L, et al. Reasons for Non-Enrollment  
510 in Treatment among Multi-Drug Resistant Tuberculosis Patients in Hunan Province,  
511 China. *PLoS One*. 2017; 12(1): e0170718. doi: 10.1371/journal.pone.0170718

512

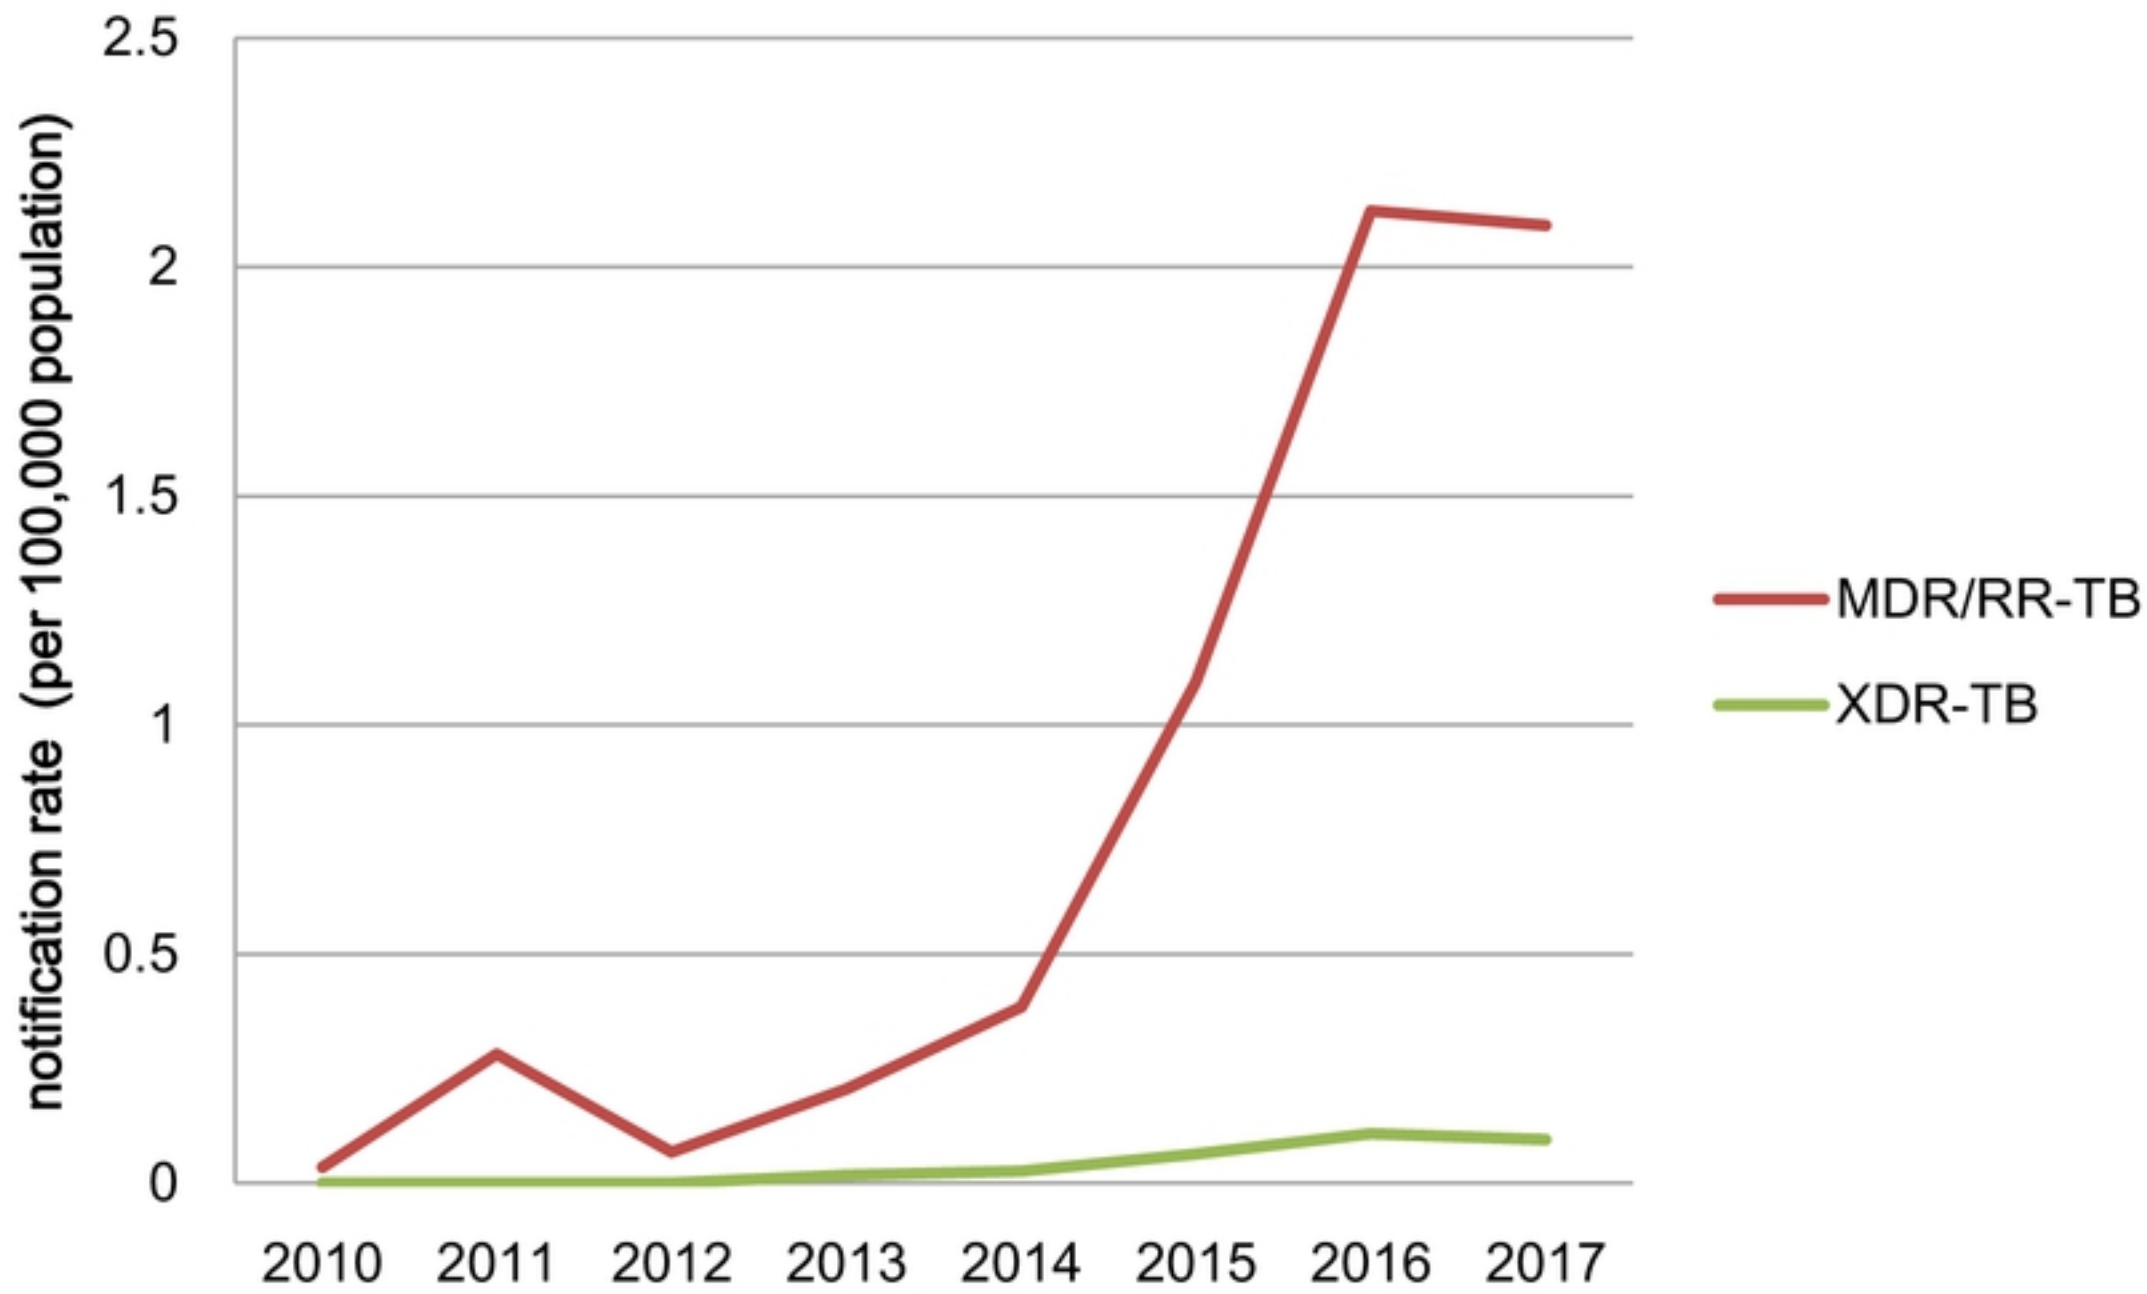

Fig1

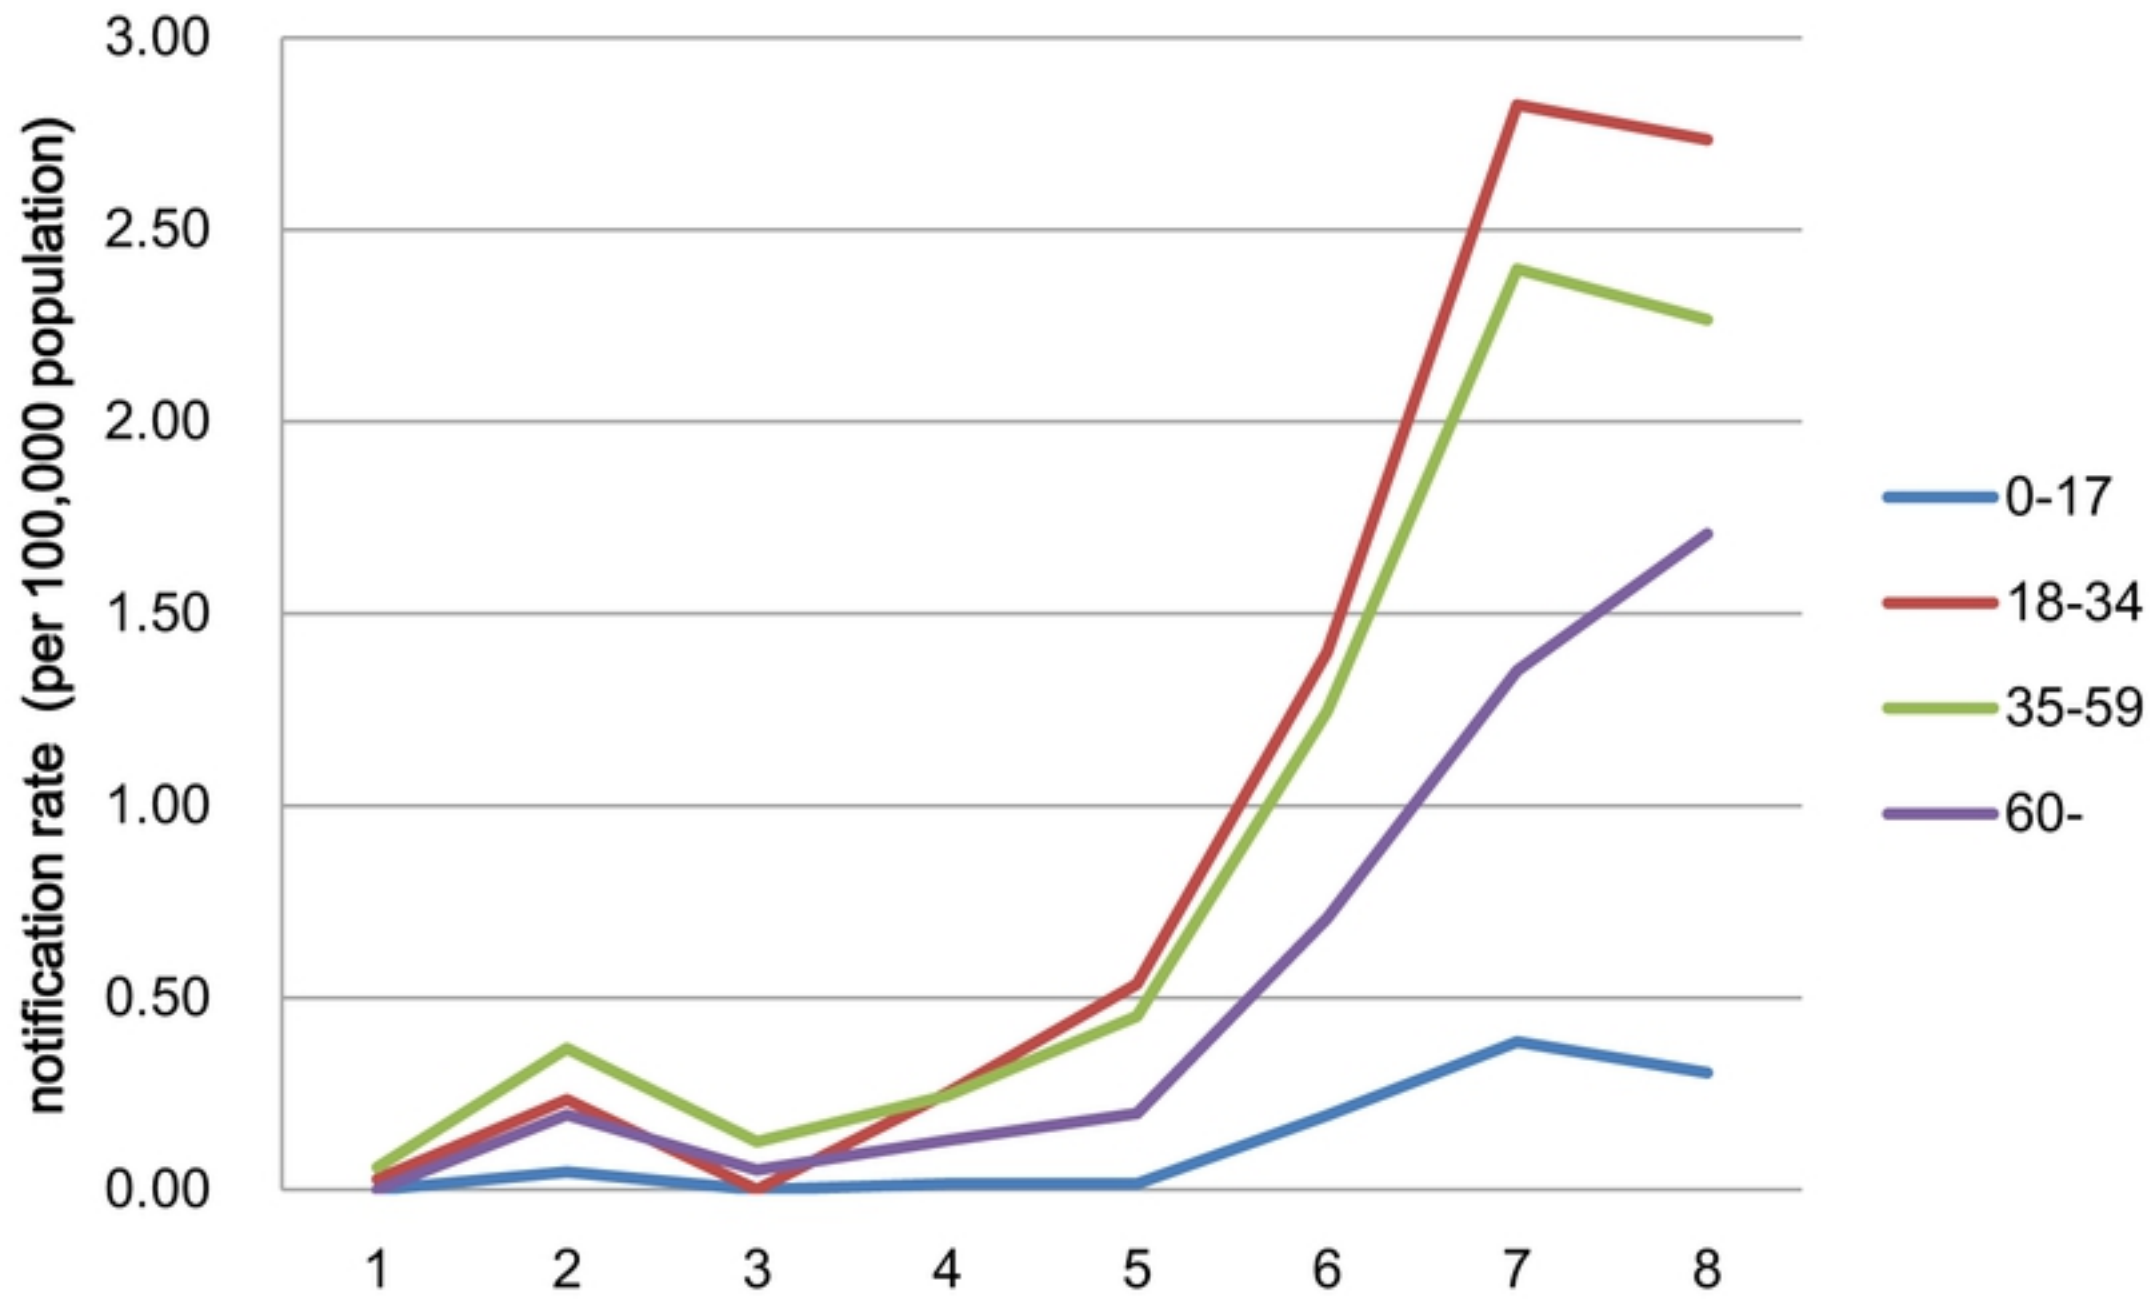

Fig2

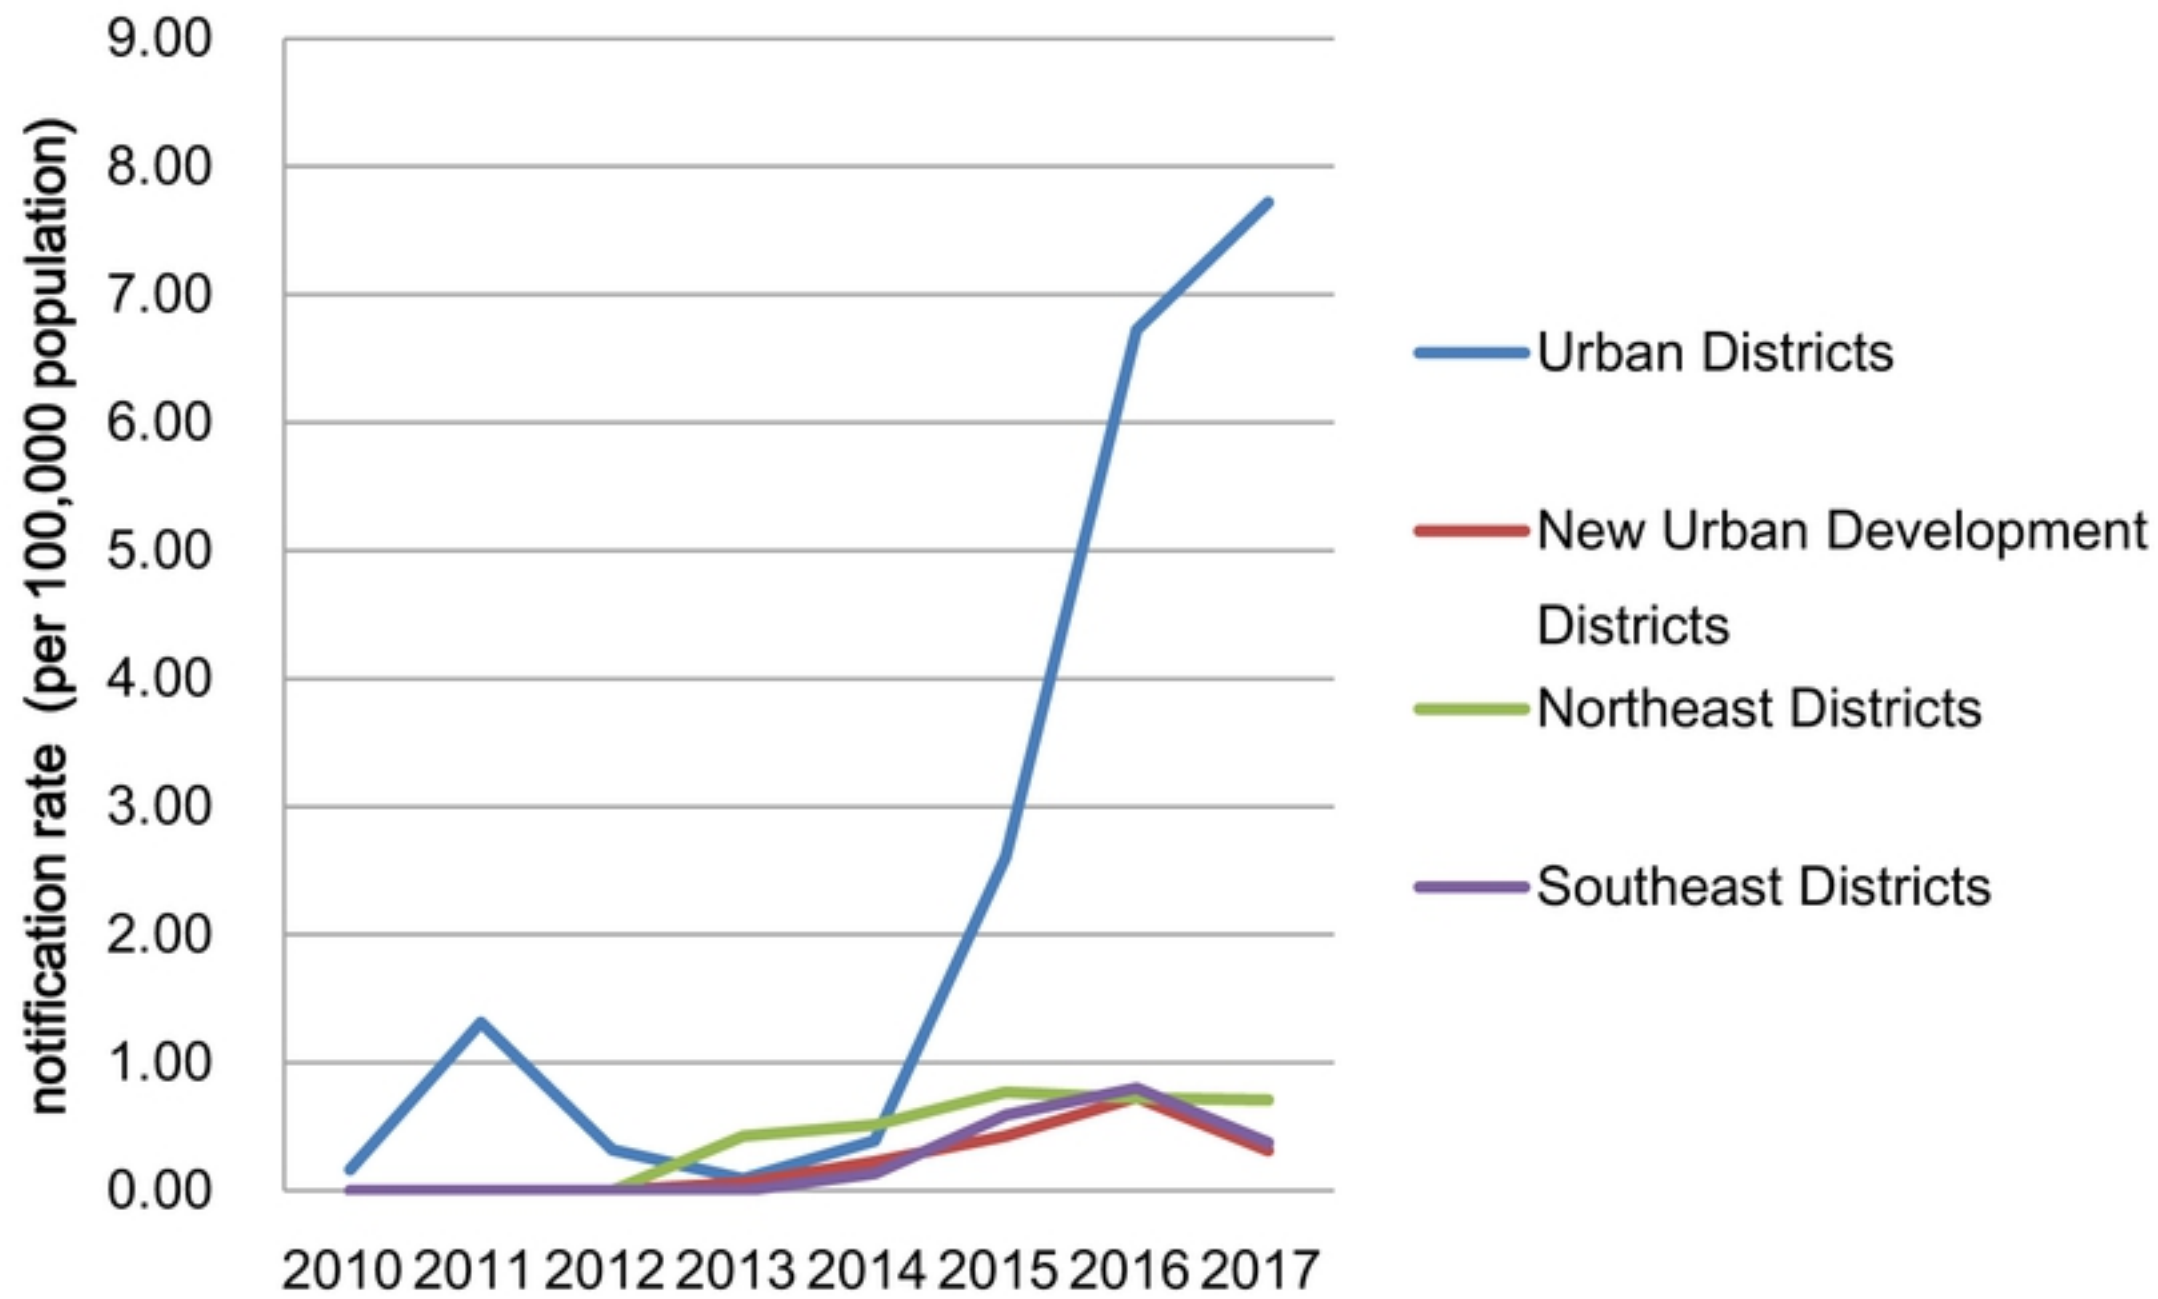

Fig3

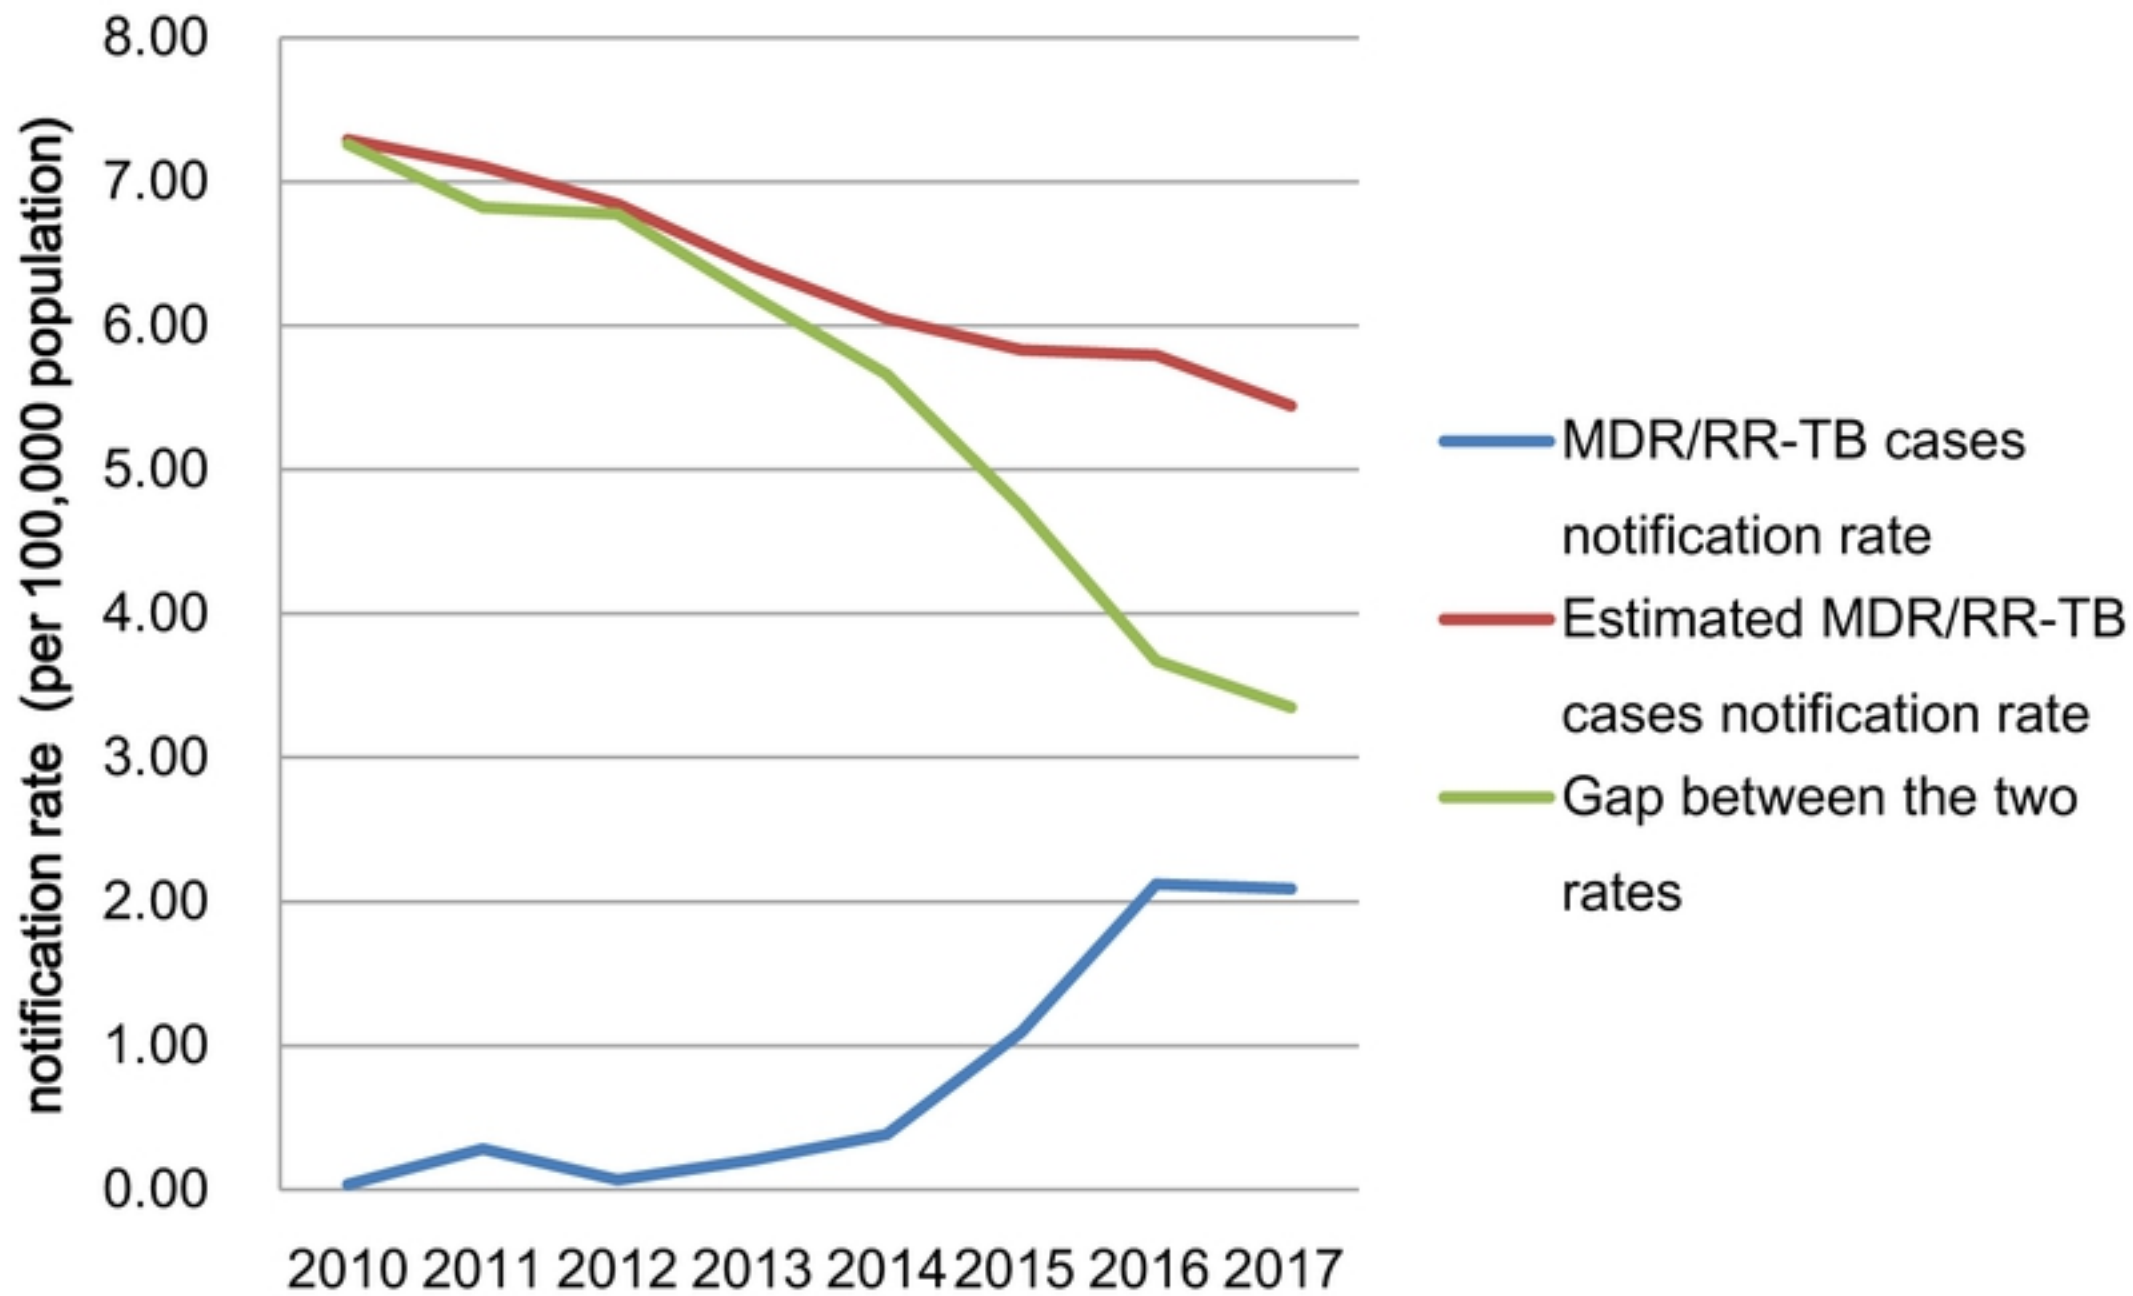

Fig4

treatment success rate

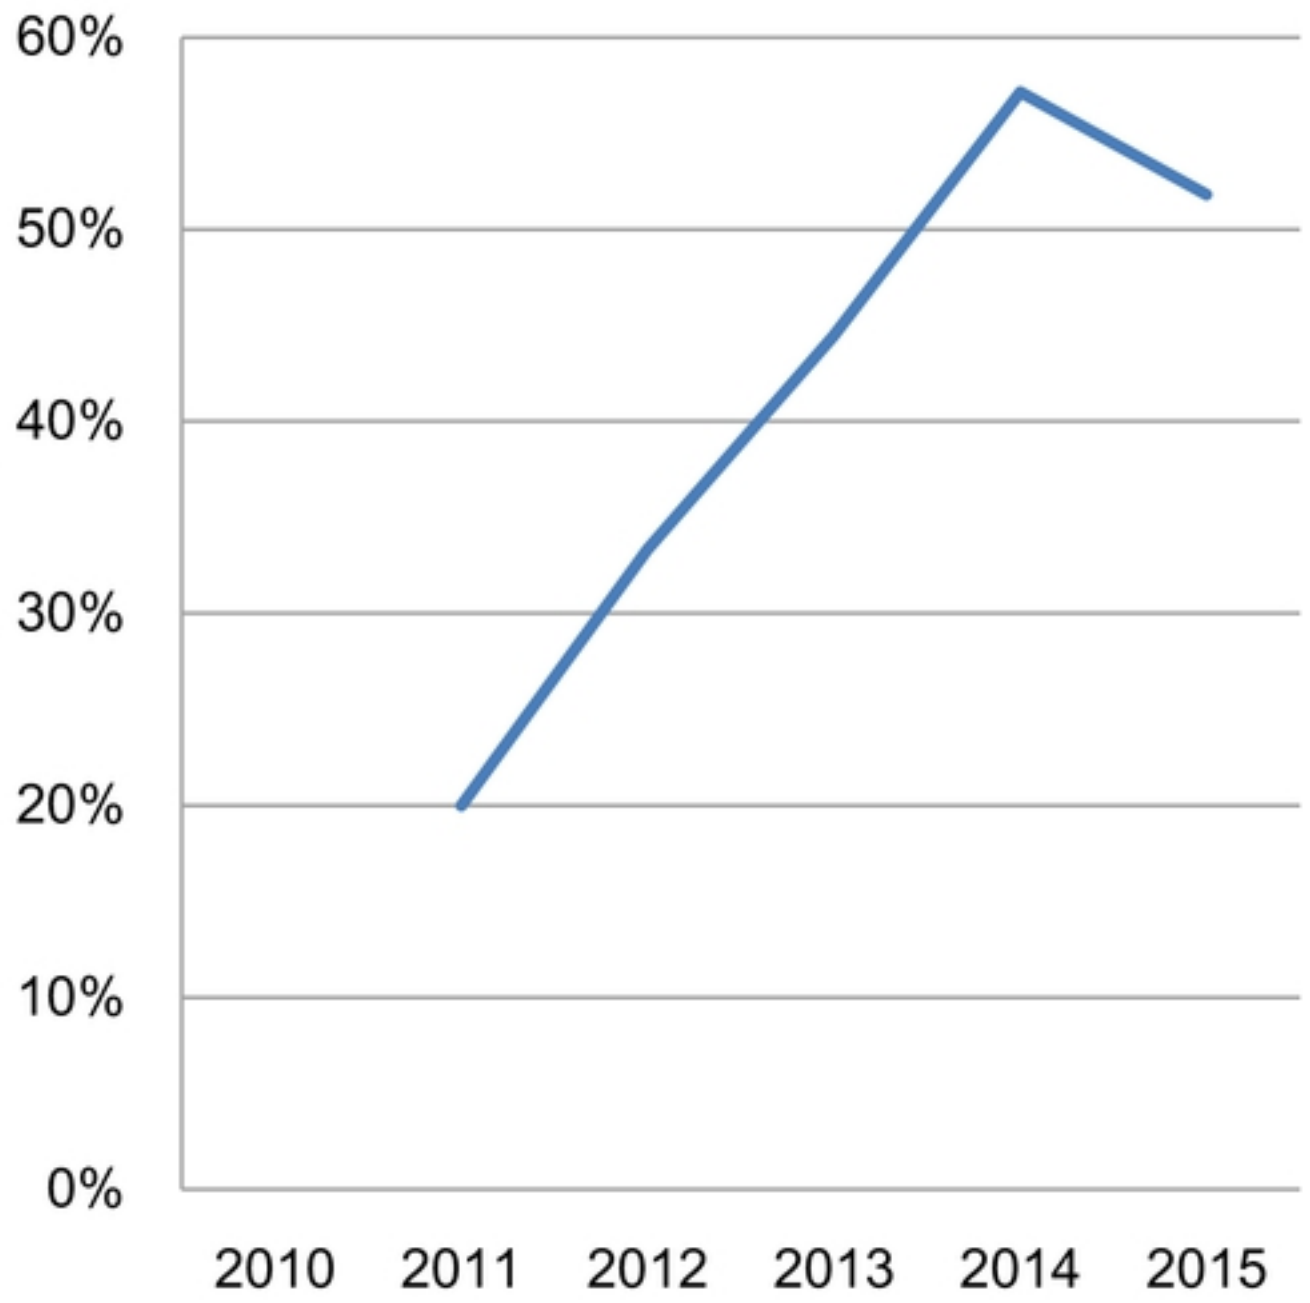

— MDR/RR-TB treatment success rate

Fig5

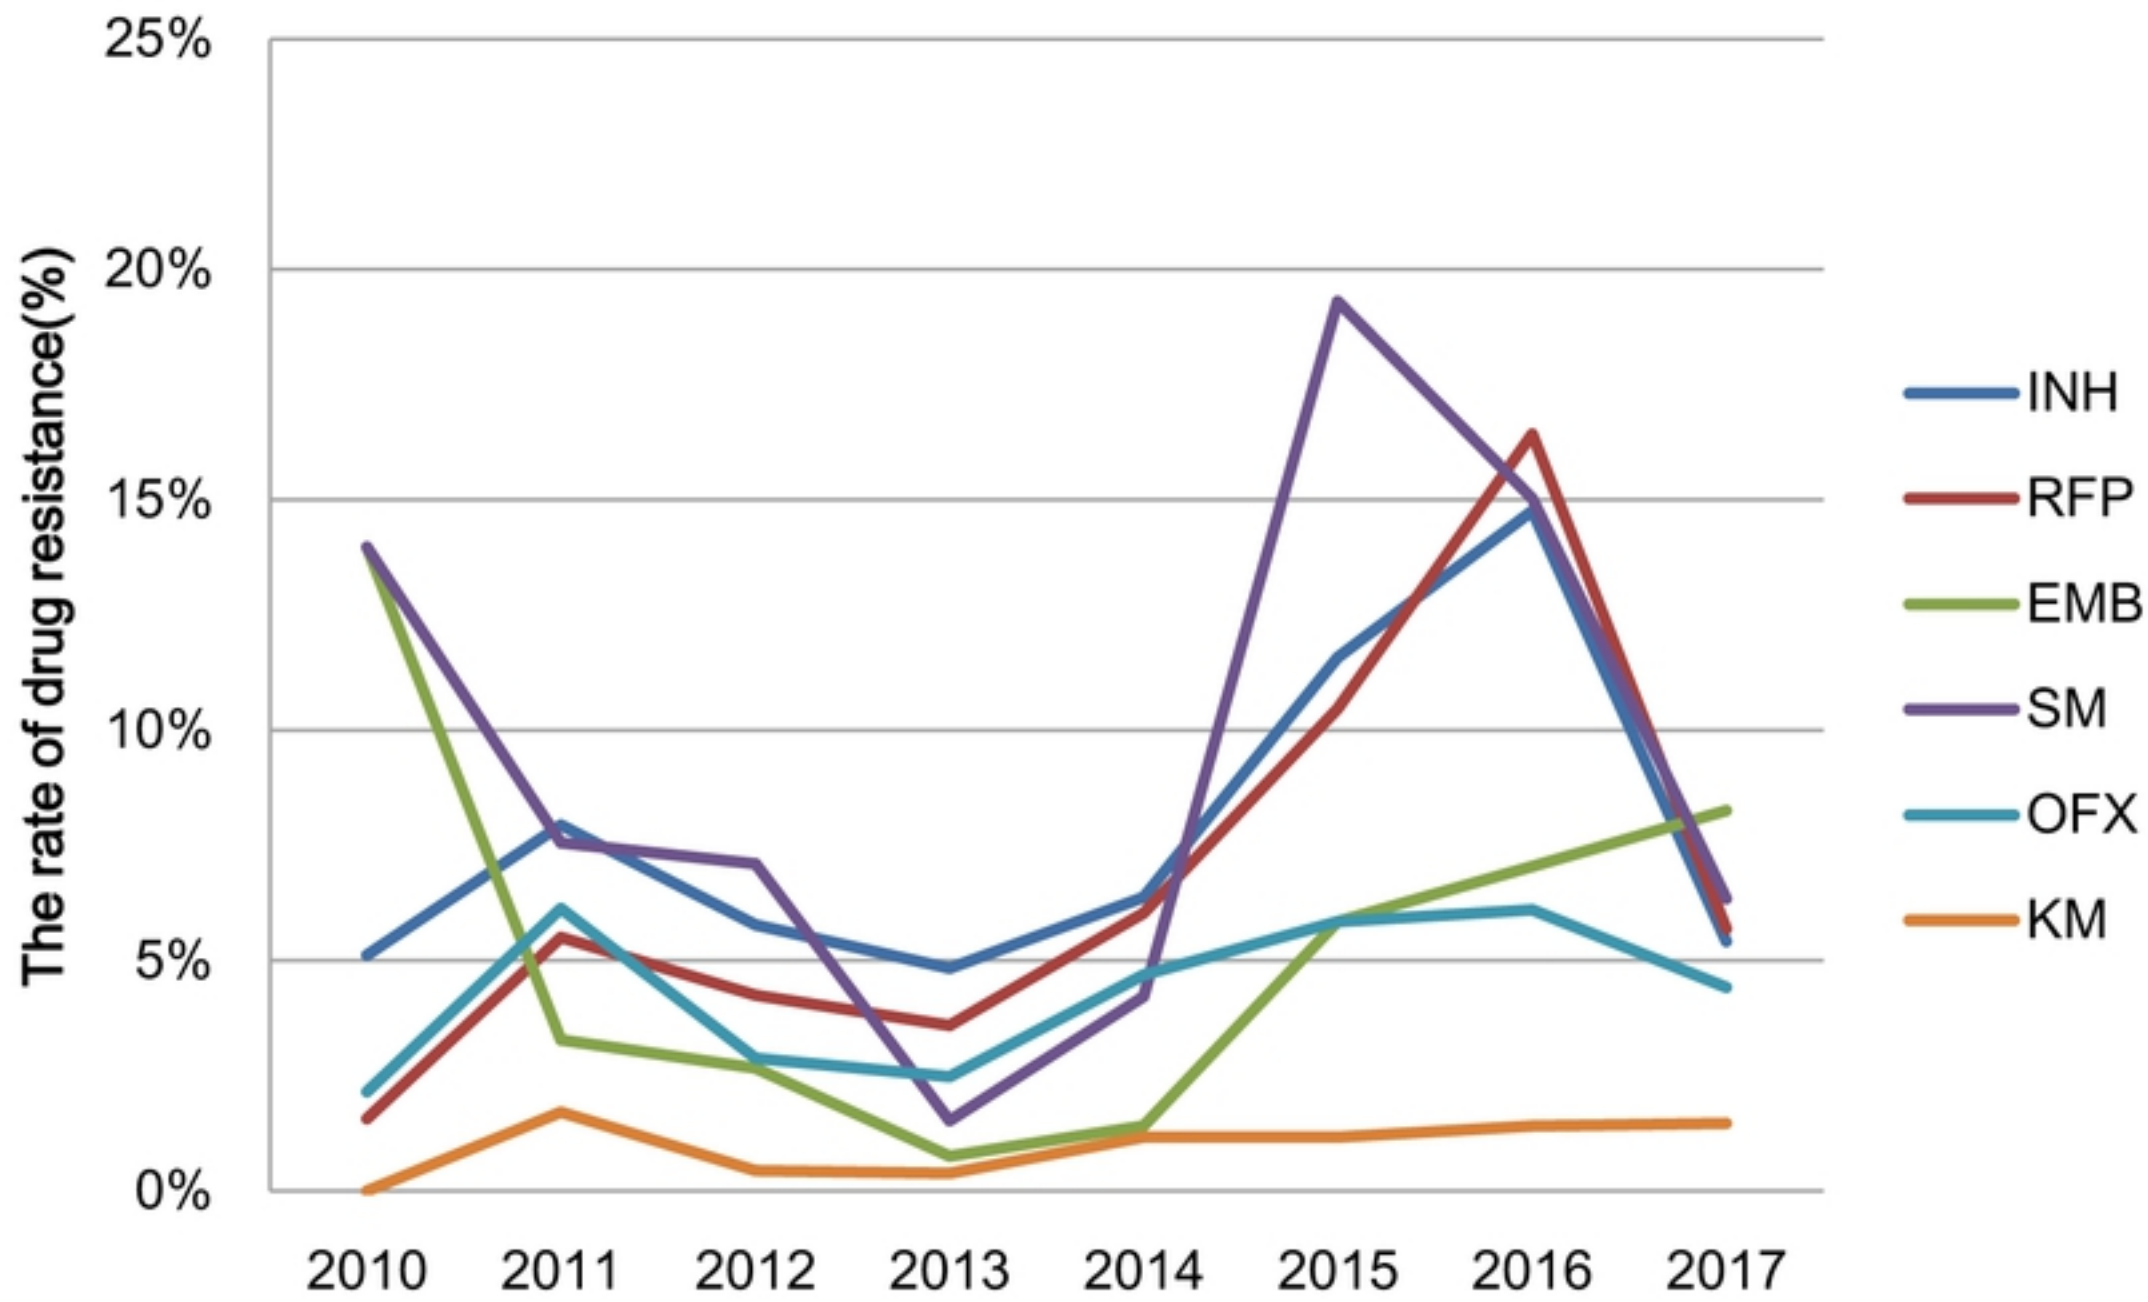

Fig6

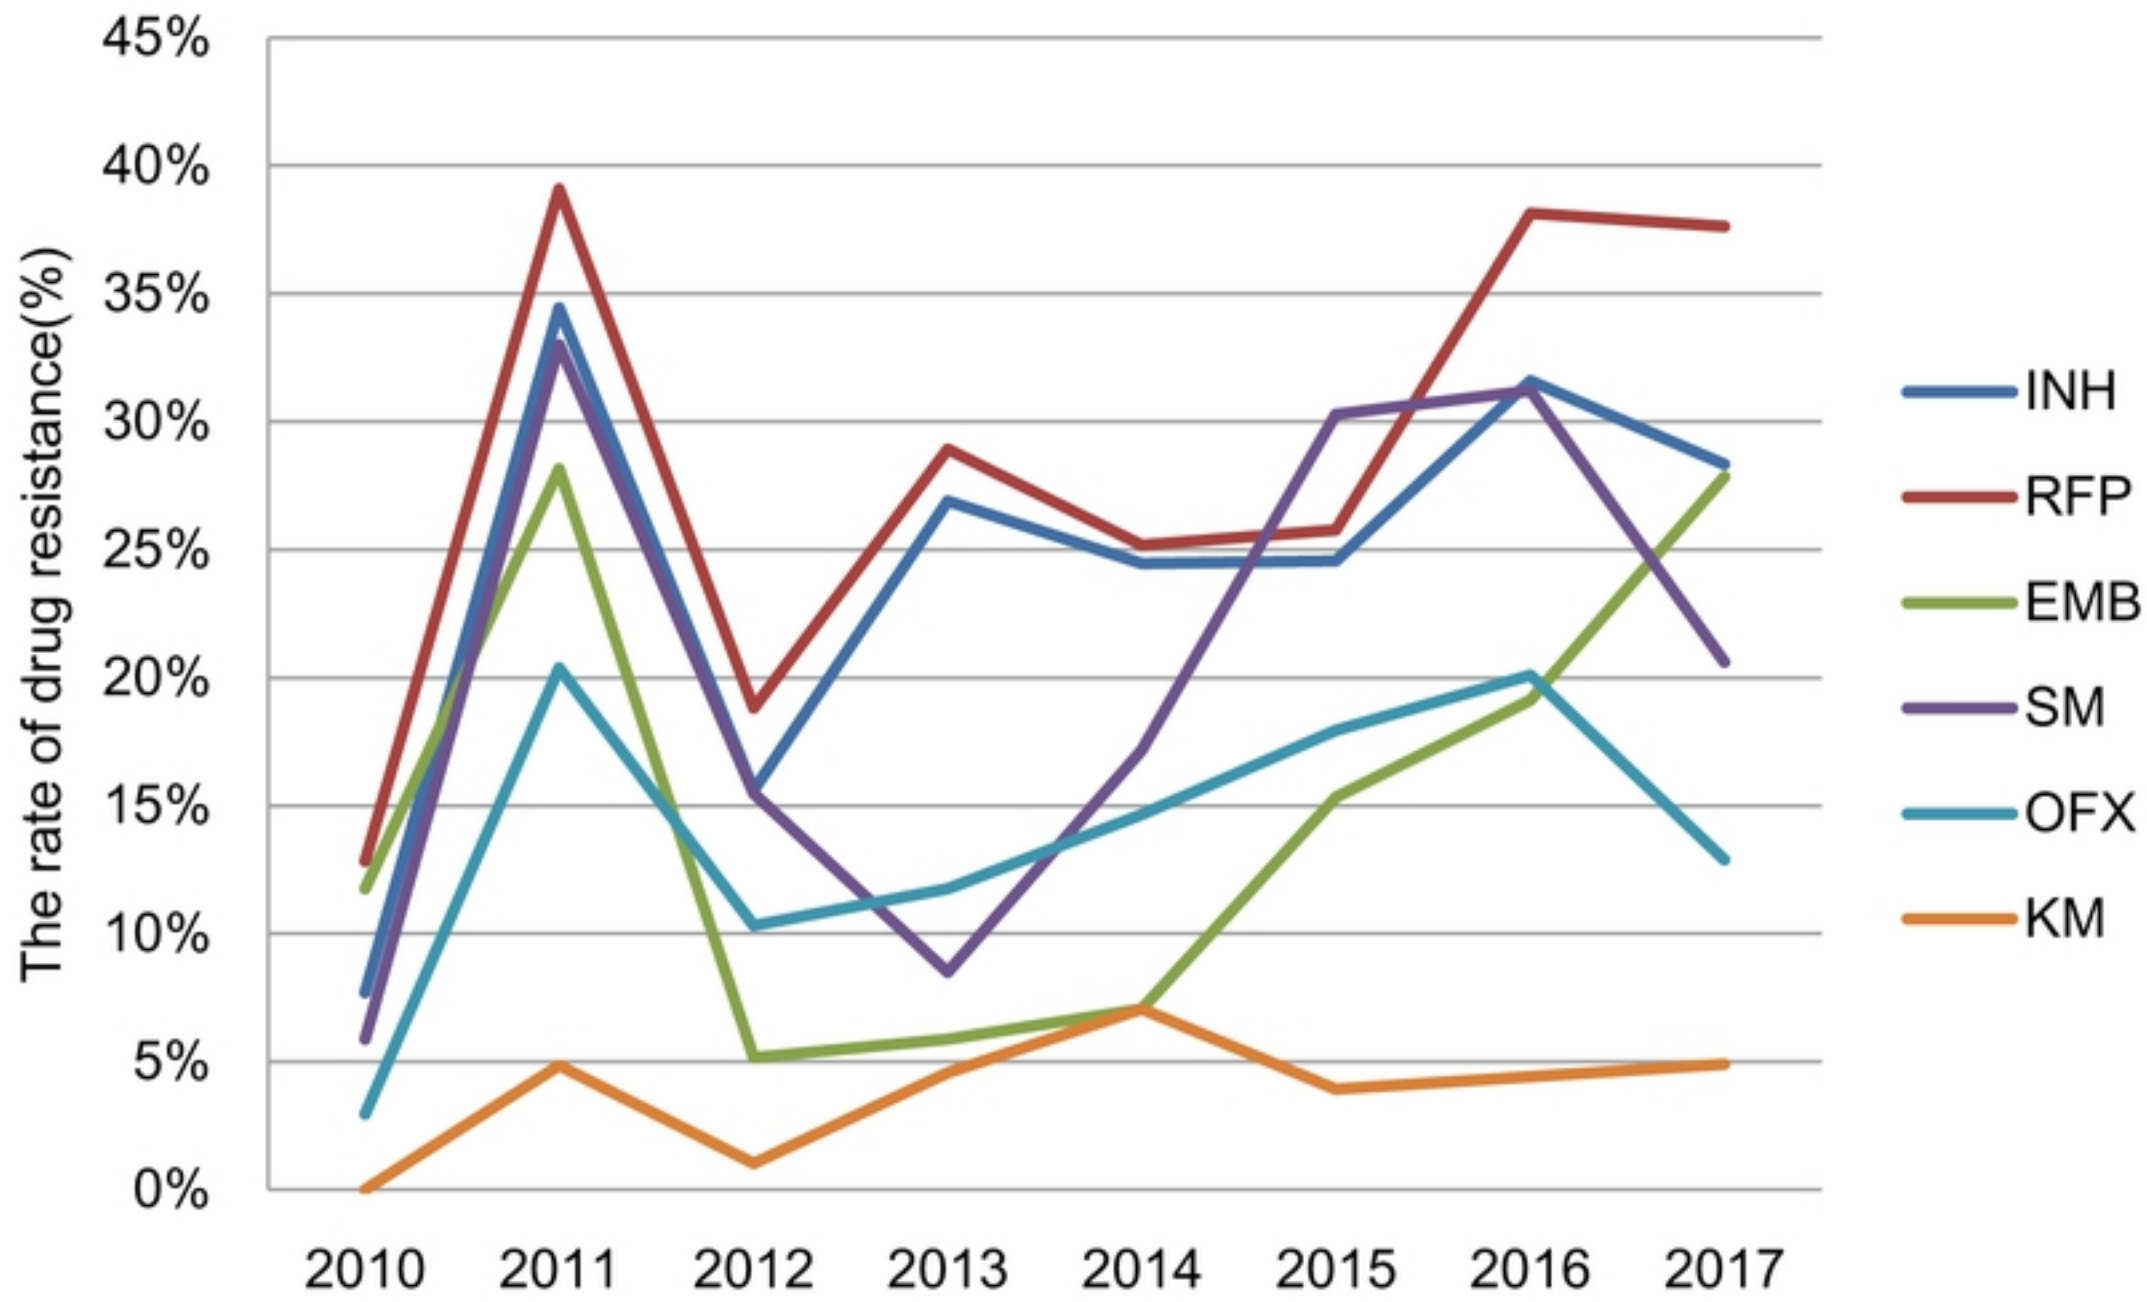

Fig7
